# Supplementary material for: A therapy with miglustat, 2-hydroxypropyl-ß-cyclodextrin and allopregnanolone restores splenic cholesterol homeostasis in Niemann-pick disease type C1
Source: PubMed Central journal article supplement (PMC6598286; doi:10.1186/s12944-019-1088-2), 2019-06-28
Supplement: 12944_2019_1088_MOESM1_ESM.pdf [file 12944_2019_1088_MOESM1_ESM.pdf]

| <b>Gene</b>                                       | <b>Assay ID/ primer and probe sequences</b>                                                                                                                                                      |
|---------------------------------------------------|--------------------------------------------------------------------------------------------------------------------------------------------------------------------------------------------------|
| <i>S1pr1</i> , Sphingosine-1-phosphate receptor 1 | Mm00514644_m1                                                                                                                                                                                    |
| <i>S1pr2</i> , Sphingosine-1-phosphate receptor 2 | Accession-Nr.: NM_010333.4<br>Forward primer sequence (5'-3'): TTGGCTGATATCGCTGATTCTGG<br>Reverse primer sequence (5'-3'): TCCAGCTGGTTCAGACAATTCC<br>Reporter sequence (5'-3'): CAGGATGGGCAAGCCA |
| <i>S1pr3</i> , Sphingosine-1-phosphate receptor 3 | Mm00515669_m1                                                                                                                                                                                    |
| <i>S1pr4</i> , Sphingosine-1-phosphate receptor 4 | Mm00468695_s1                                                                                                                                                                                    |
| <i>S1pr5</i> , Sphingosine-1-phosphate receptor 5 | Mm00474763_m1                                                                                                                                                                                    |
| <i>Ppia</i> , cyclophilin A                       | Mm02342430_g1                                                                                                                                                                                    |
| <i>Actb</i> , $\beta$ -Actin                      | Mm00607939_s1                                                                                                                                                                                    |
